# NEW SPRING TITLES in PSYCHIATRY

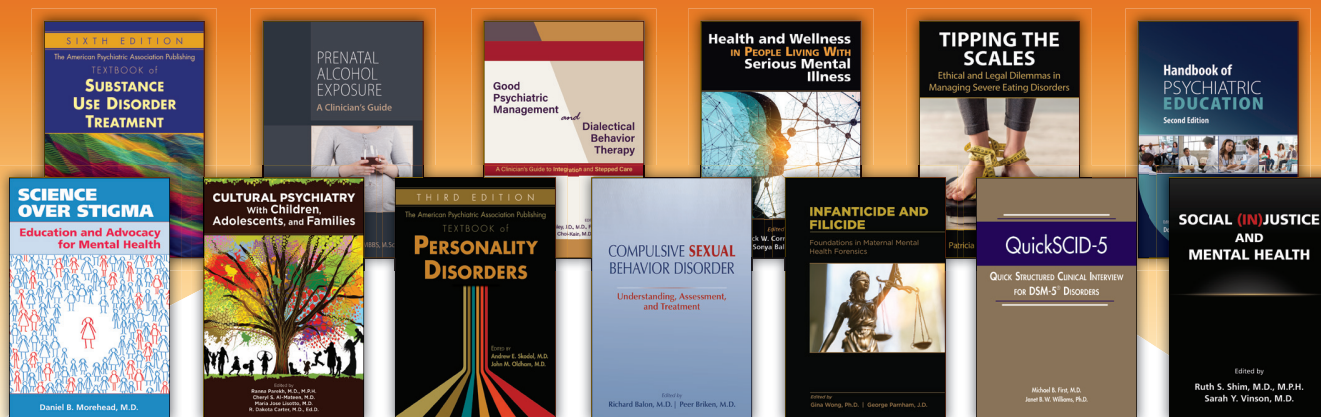

## The American Psychiatric Association Publishing Textbook of Substance Use Disorder Treatment, Sixth Edition

Edited by Kathleen T. Brady, M.D., Ph.D., Frances R. Levin, M.D., Marc Galanter, M.D., and Herbert D. Kleber, M.D.

2021 • 912 pages • ISBN 978-1-61537-221-8  
Hardcover • \$215.00 • Item #37221

2021 • 912 pages • ISBN 978-1-61537-353-6  
eBook • \$175.00 • Item #37353

## Science Over Stigma Education and Advocacy for Mental Health

Daniel B. Morehead, M.D.

2021 • 224 pages • ISBN 978-1-61537-307-9  
Paperback • \$39.00 • Item #37307

2021 • 224 pages • ISBN 978-1-61537-381-9  
eBook • \$31.00 • Item #37381

## Prenatal Alcohol Exposure A Clinician's Guide

Mansfield Mela, M.B. B.S., M.Sc.Psych.

2021 • 472 pages • ISBN 978-1-61537-239-3  
Paperback • \$72.00 • Item #37239

2021 • 472 pages • ISBN 978-1-61537-369-7  
eBook • \$58.00 • Item #37369

## Cultural Psychiatry With Children, Adolescents, and Families

Edited by Ranna Parekh, M.D., M.P.H., Cheryl S. Al-Mateen, M.D., Maria Jose Lisotto, M.D., and R. Dakota Carter, M.D., EdD

2021 • 480 pages • ISBN 978-1-61537-333-8  
Paperback • \$69.00 • Item #37333

2021 • 480 pages • ISBN 978-1-61537-371-0  
eBook • \$55.00 • Item #37371

## The American Psychiatric Association Textbook of Personality Disorders, Third Edition

Edited by Andrew E. Skodol, M.D., and John M. Oldham, M.D., M.S.

2021 • 760 pages • ISBN 978-1-61537-339-0  
Hardcover • \$180.00 • Item #37339

2021 • 760 pages • ISBN 978-1-61537-374-1  
eBook • \$144.00 • Item #37374

## Good Psychiatric Management and Dialectical Behavior Therapy A Clinician's Guide to Integration and Stepped Care

Edited by Anne K.I. Sonley, J.D., M.D., FRCPC, and Lois W. Choi-Kain, M.D., M.Ed.

2021 • 193 pages • ISBN 978-1-61537-341-3  
Paperback • \$55.00 • Item #37341

2021 • 193 pages • ISBN 978-1-61537-372-7  
eBook • \$44.00 • Item #37372

## Health and Wellness in People Living With Serious Mental Illness

Edited by Patrick W. Corrigan, Psy.D., and Sonya L. Ballentine

2021 • 340 pages • ISBN 978-1-61537-379-6  
Paperback • \$59.00 • Item #37379

2021 • 340 pages • ISBN 978-1-61537-380-2  
eBook • \$47.00 • Item #37380

## Infanticide and Filicide Foundations in Maternal Mental Health Forensics

Edited by Gina Wong, Ph.D., and George Parnham, J.D.

2021 • 464 pages • ISBN 978-1-61537-351-2  
Paperback • \$67.00 • Item #37351

2021 • 464 pages • ISBN 978-1-61537-370-3  
eBook • \$54.00 • Item #37370

## Compulsive Sexual Behavior Disorder Understanding, Assessment, and Treatment

ORDER @ [www.appi.org](http://www.appi.org) | Email: [appi@psych.org](mailto:appi@psych.org) | Toll Free: 1-800-368-5777

20% Discount for American Psychiatric Association Members

25% Discount for APA Resident-Fellow Members

Edited by Richard Balon, M.D., and Peer Briken, M.D.

2021 • 216 pages • ISBN 978-1-61537-219-5  
Paperback • \$49.00 • Item #37219

2021 • 216 pages • ISBN 978-1-61537-378-9  
eBook • \$39.00 • Item #37378

## Tipping the Scales Ethical and Legal Dilemmas in Managing Severe Eating Disorders

Edited by Patricia Westmoreland, M.D.

2021 • 230 pages • ISBN 978-1-61537-349-9  
Paperback • \$60.00 • Item #37349

2021 • 230 pages • ISBN 978-1-61537-377-2  
eBook • \$48.00 • Item #37377

## Handbook of Psychiatric Education, Second Edition

Edited by Donna M. Sudak, M.D.

2021 • 288 pages • ISBN 978-1-61537-344-4  
Paperback • \$68.00 • Item #37344

2021 • 288 pages • ISBN 978-1-61537-382-6  
eBook • \$54.00 • Item #37382

## Quick Structured Clinical Interview for DSM-5® Disorders (QuickSCID-5)

Michael B. First, M.D., and Janet B. W. Williams, Ph.D.

2021 • 61 pages • ISBN 978-1-61537-363-5  
Paperback • \$77.00 • Item #37363

## Social (In)Justice and Mental Health

Edited by Ruth S. Shim, M.D., M.P.H., and Sarah Y. Vinson, M.D.

2021 • 298 pages • ISBN 978-1-61537-338-3  
Paperback • \$49.00 • Item #37338

2021 • 298 pages • ISBN 978-1-61537-376-5  
eBook • \$39.00 • Item #37376
