# Psychiatric Services

A Journal of the American Psychiatric Association

*Psychiatric Services* (ISSN 1075-2730; online version 1557-9700) is published monthly by the American Psychiatric Association, 800 Maine Ave., S.W., Suite 900, Washington, DC 20024. Copyright © 2021 by the American Psychiatric Association. Printed in U.S.A. Periodicals postage paid at Washington, D.C., and at additional mailing offices. POSTMASTER: Send all address changes to Circulation Department, *Psychiatric Services*, 800 Maine Ave., S.W., Suite 900, Washington, DC 20024.

## Business Information for Readers

### Print Subscriptions

For U.S. members of the American Psychiatric Association (APA), a one-year subscription (12 issues) is \$132. For international APA members, the one-year rate is \$240. Resident-Fellow APA members receive a free online subscription as a benefit of membership. For individuals who are not APA members, a one-year subscription is \$177 within the U.S. and \$264 outside the U.S. Discounted two-year subscriptions are also available. To order and for more information, contact Customer Service (800-368-5777 or 202-559-3900; [appi@psych.org](mailto:appi@psych.org)). Individual subscriptions can also be ordered online by visiting the American Psychiatric Association Publishing website at [www.appi.org](http://www.appi.org).

Institutional subscriptions are tier priced. For institutional site license information and pricing, contact Customer Service (800-368-5777 or 202-559-3900; [institutions@psych.org](mailto:institutions@psych.org)).

Subscription orders can also be mailed to Customer Service at the American Psychiatric Association, 800 Maine Ave., S.W., Suite 900, Washington, DC 20024. Make checks payable to the American Psychiatric Association.

All subscriptions to the print journal include full-text online access ([ps.psychiatryonline.org](http://ps.psychiatryonline.org)). Use your APP or APA username and password for full-text access (these can be retrieved at [www.psychiatryonline.org](http://www.psychiatryonline.org)). Individual subscribers also have free full-text access to the journal's Legacy Collection (1950–1996).

### Online-Only Subscriptions

APA members, including international members, can purchase an online-only subscription for \$120 per year. For individuals outside the U.S. who are not APA members, a one-year online-only subscription is \$159.

### Address Changes and Subscription Inquiries

For address changes and inquiries about subscription status or billing, contact Customer Service (800-368-5777 or 202-559-

3900; [appi@psych.org](mailto:appi@psych.org)). For faster service, refer to the personal I.D. number located above the name on the mailing label. For address changes, include both the old and the new address. Please give at least six weeks' notice of a change of address to ensure uninterrupted service. Please notify Customer Service of missed issues within two months and allow two to three weeks for delivery.

### Single Issues

Single issues from previous volumes or earlier issues in the current volume are available for purchase from Customer Service. Single issues are \$50 in the U.S. and \$69 outside the U.S.

### Permissions and Reprints

Material published in the journals of the American Psychiatric Association and American Psychiatric Association Publishing is protected by copyright and all rights are reserved. Material may not be reproduced in any form or by any means without written permission from the copyright owner. For permission to reproduce material from American Psychiatric Association and American Psychiatric Association Publishing journals, please visit [www.appi.org/customerservice/pages/Permissions.aspx](http://www.appi.org/customerservice/pages/Permissions.aspx) for more information. Permission can also be secured through the Copyright Clearance Center ([www.copyright.com](http://www.copyright.com)). For bulk reprints, please contact [permissions@psych.org](mailto:permissions@psych.org).

### Advertising

For advertising rates and other information, contact Tim Wolfinger, advertising sales representative, Pharmaceutical Media, Inc., 212-904-0379; [twolfinger@pminy.com](mailto:twolfinger@pminy.com). All ads are subject to editorial approval before publication. APA accepts no responsibility for claims made by advertisers. The acceptance of advertising does not in any way constitute APA endorsement or approval of any advertised service or product.

# Titles to Help Mental Health Professionals

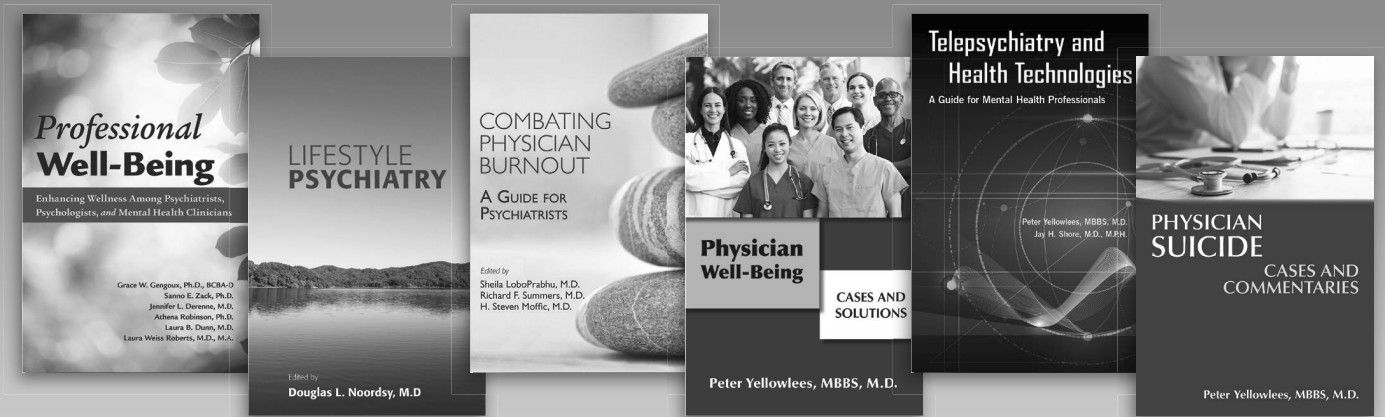

## Professional Well-Being

Enhancing Wellness Among Psychiatrists, Psychologists, and Mental Health Clinicians

Grace W. Gengoux, Ph.D., BCBA-D,  
Sanno E. Zack, Ph.D.,  
Jennifer L. Derenne, M.D.,  
Athena Robinson, Ph.D.,  
Laura B. Dunn, M.D., and  
Laura Weiss Roberts, M.D., M.A.

Physician self-care is correlated with patient care; a growing body of evidence supports this. Yet, a culture persists within medicine that values overwork, perfectionism, and self-sacrifice, often to the detriment of clinicians themselves. This book advocates for a new culture—one that is supportive of the health and well-being of health professionals to the benefit of the patients and populations they serve.

2020 • 298 pages • ISBN 978-1-61537-229-4  
Paperback • \$55.00 • Item #37229

2020 • 298 pages • ISBN 978-1-61537-308-6  
eBook • \$44.00 • Item #37308

## Lifestyle Psychiatry

Edited by Douglas L. Noordsy, M.D.

The book discusses the impact of the provider's lifestyle on clinical behavior and the implications of lifestyle medicine and psychiatry for health care systems and population health, offering a broader examination of the important role this new field can play in leading a sophisticated, holistic approach to optimizing wellness.

2019 • 416 pages • ISBN 978-1-61537-166-2  
Paperback • \$59.00 • Item #37166

2019 • 416 pages • ISBN 978-1-61537-252-2  
eBook • \$47.00 • Item #37252

## Combating Physician Burnout

A Guide for Psychiatrists

Edited by Sheila LoboPrabhu, M.D.,  
Richard F. Summers, M.D., and  
H. Steven Moffic, M.D.

This book aims to educate psychiatrists about three key concepts: stress, burnout, and physician impairment. The introduction discusses the history and social context of burnout. Subsequent sections discuss the potential effects of burnout on clinical care, contextual elements that may contribute to burnout, potential systemic and individual interventions, and the moral challenge burnout poses to psychiatry.

2020 • 344 pages • ISBN 978-1-61537-227-0  
Paperback • \$60.00 • Item #37227

2020 • 344 pages • ISBN 978-1-61537-272-0  
eBook • \$48.00 • Item #37272

## Physician Well-Being

Cases and Solutions

Peter Yellowlees, MBBS, M.D.

This book focuses its gaze on the range of the provider experience, from pre-med programs to specific scenarios such as medical marriages. Through fictional case studies, it proposes solutions designed to make today's typical health care environments more effective.

2020 • 265 pages • ISBN 978-1-61537-240-9  
Paperback • \$55.00 • Item #37240

2020 • 265 pages • ISBN 978-1-61537-290-4  
eBook • \$44.00 • Item #37290

## Telepsychiatry and Health Technologies

A Guide for Mental Health Professionals

Peter Yellowlees, MBBS, M.D.  
Jay H. Shore, M.D., M.P.H.

## Telepsychiatry and Health Technologies

A Guide for Mental Health Professionals

Peter Yellowlees, MBBS, M.D., and  
Jay H. Shore, M.D., M.P.H.

This is a practical guide for mental health professionals seeking innovative digital technologies to improve the quality of care for patients with psychiatric disorders. Beginning with an overview of current psychiatric practice, the authors cover the broader context of telepsychiatry, give specific guidance on setting up and managing a telepsychiatry practice; and discuss in-person, online, and hybrid models of care, as well as data collection, electronic records, clinical documentation, and ethics.

2018 • 403 pages • ISBN 978-1-61537-085-6  
Paperback • \$69.00 • Item #37085

2018 • 403 pages • ISBN 978-1-61537-160-0  
eBook • \$55.00 • Item #37160

## Physician Suicide

Cases and Commentaries

Peter Yellowlees, MBBS, M.D.

The book examines how the related disorders of burnout, anxiety, depression, and addiction, can lead to suicide and explores the influence of gender, culture, aging, and personal resilience on outcomes. In addition, it investigates ways to mitigate the impact of these factors to improve physician health and well-being and thereby reduce the number of physicians who kill themselves.

2019 • 251 pages • ISBN 978-1-61537-169-3  
Paperback • \$52.00 • Item #37169

2019 • 251 pages • ISBN 978-1-61537-213-3  
eBook • \$41.95 • Item #37213

# The American Journal of Psychotherapy

APA's journal of psychotherapy practice and research

Since 1947, the *American Journal of Psychotherapy* has provided a forum for advancing the theory, science, and clinical practice of psychotherapy, publishing articles that expand understanding of psychotherapies, especially in the domains of efficacy, process, education, and practice. The journal provides authors and readers the opportunity to engage fully in pressing psychotherapy issues such as defining core elements of psychotherapies, dissemination of evidence-based practices, scaling best practices for expansion to larger populations, understanding mechanisms of change, and evaluating best practices for psychotherapy training and supervision. From its new home as part of APA Publishing's portfolio of journals, the *American Journal of Psychotherapy* is the ideal vehicle to disseminate knowledge about psychotherapy and send a message that psychotherapy remains firmly within the purview of psychiatry.

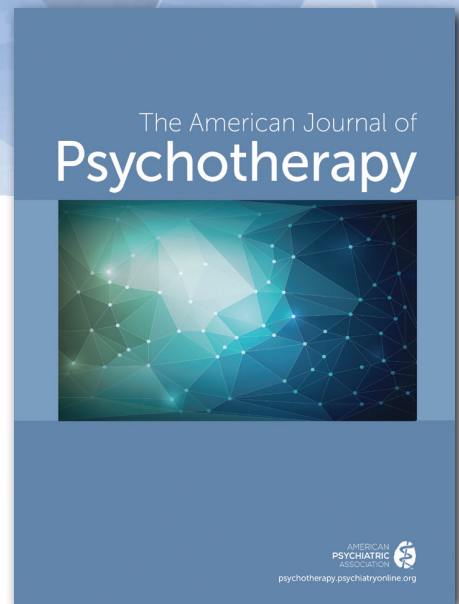

Holly A. Swartz, M.D., Editor-in-Chief

Frequency: Quarterly

Online ISSN: 2575-6559

[psychotherapy.psychiatryonline.org](http://psychotherapy.psychiatryonline.org)

- To receive updates on new content, follow the journal on  Twitter ([@APAPubJournals](https://twitter.com/APAPubJournals)) and sign up for free publication alerts at [psychiatryonline.org](http://psychiatryonline.org)
- To see more from the journal, including its entire 70+-year archive or to get information about submitting a paper, visit [www.psychotherapy.psychiatryonline.org](http://www.psychotherapy.psychiatryonline.org)

Check out the most discussed and downloaded papers of those recently published:

- Should Psychotherapy Become a Subspecialty of Psychiatry?
- The Role of Psychotherapy During the COVID-19 Pandemic
- Mass Shootings and Psychotherapy
- Racism: A Challenge for the Therapeutic Dyad

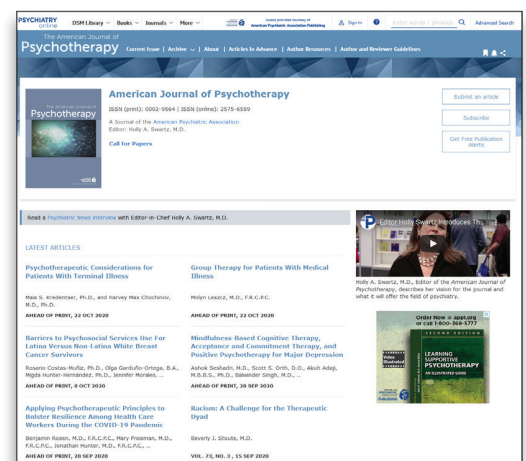

Searching for  
the perfect  
psychiatric  
career?

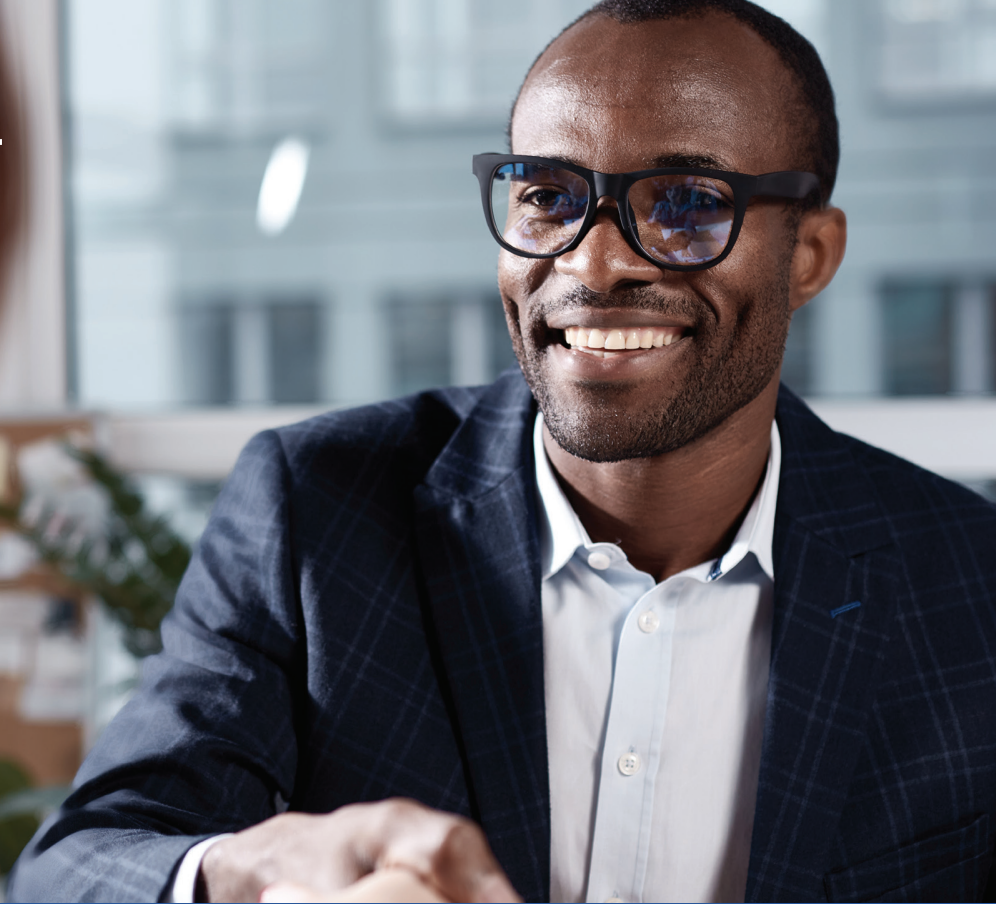

## Let APA JobCentral help!

### Manage Your Career

- Browse hundreds of active job listings!
- Create an account to save jobs, store multiple resumes and cover letters and communicate with employers through our internal messaging system.
- Set up multiple job alerts specifying your skills, interests and location to receive e-mails when employers post jobs that match your criteria.

### Recruit for Open Positions

- Post your job in front of thousands of highly qualified psychiatrists.
- Cross promote your job listing in Psychiatric News.
- Search the anonymous resume database to find your ideal candidate.

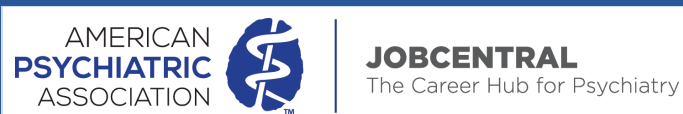

[jobs.psychiatry.org](https://jobs.psychiatry.org)
