# Psychiatric Services

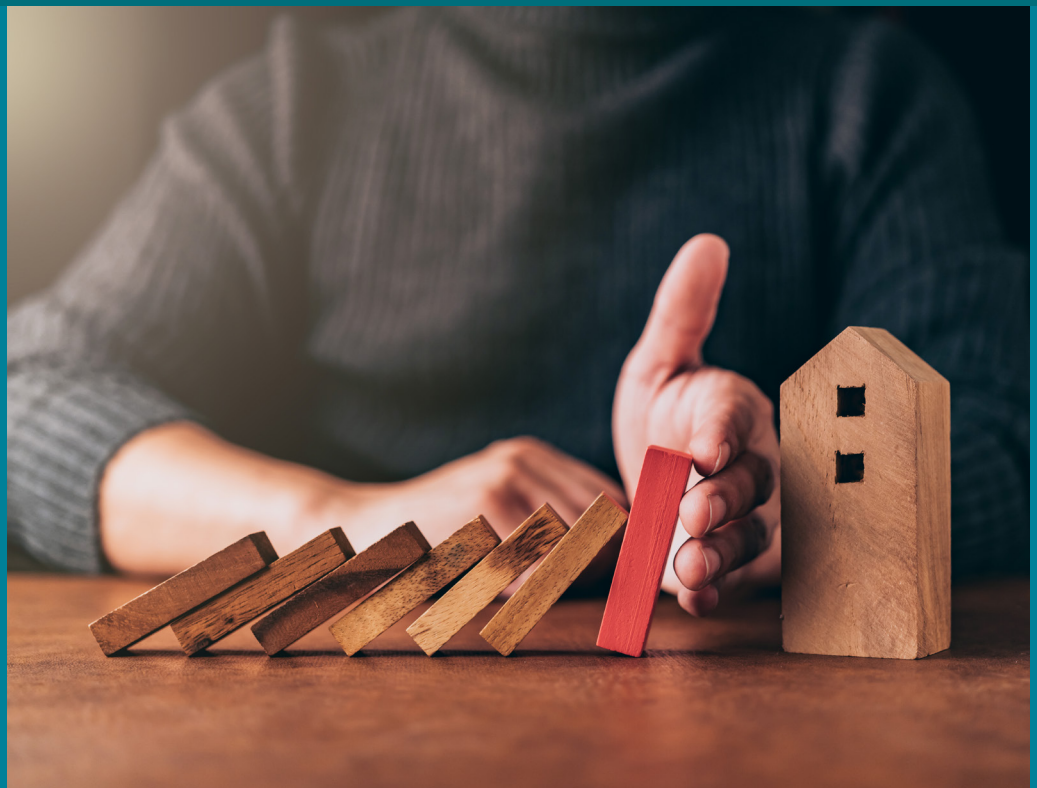

Risk factors of child protective services involvement

Systematic review of efficacy of cannabinoids to treat mood disorders

Mental health services in a U.S. prison during the pandemic

Personal Accounts: The radicalization of a White psychiatrist
